# Supplementary material for: Cancer-derived immunoglobulin G promotes LPS-induced proinflammatory cytokine production via binding to TLR4 in cervical cancer cells
Source: PubMed Central journal article supplement (PMC4259433; doi:10.18632/oncotarget.2359), 2014-08-23
Supplement: oncotarget-05-9727-s001.pdf [file oncotarget-05-9727-s001.pdf]

**Supplementary Table S1. Details of Primary and Second Antibodies.**

| Primary antibody                                                  | Source | Dilution | Incubation           | Supplier                       |
|-------------------------------------------------------------------|--------|----------|----------------------|--------------------------------|
| IgG ( $\gamma$ chain specific)                                    | Rabbit | 1:500    | 4°C, overnight       | Dako, Denmark                  |
| phosphothreonine ERK-1/2                                          | Mouse  | 1:500    | 4°C, overnight       | Sigma-Aldrich, USA             |
| Phospho-SAPK/JNK (Thr183/Tyr185)                                  | Mouse  | 1:500    | 4°C, overnight       | Cell Signaling Technology, USA |
| Phospho-p38 MAPK (Thr180/Tyr182)                                  | Rabbit | 1:500    | 4°C, overnight       | Cell Signaling Technology, USA |
| Phospho-Ikk $\alpha$ / $\beta$ (Ser176/180)                       | Rabbit | 1:500    | 4°C, overnight       | Cell Signaling Technology, USA |
| Phospho-I $\kappa$ B $\alpha$ (Ser32)                             | Rabbit | 1:500    | 4°C, overnight       | Cell Signaling Technology, USA |
| Phospho-NF- $\kappa$ B p65 (Ser536)                               | Rabbit | 1:500    | 4°C, overnight       | Cell Signaling Technology, USA |
| NF- $\kappa$ B p65                                                | Rabbit | 1:500    | 4°C, overnight       | Cell Signaling Technology, USA |
| TLR4                                                              | Mouse  | 1:500    | 4°C, overnight       | Abcam, USA                     |
| TLR4 (PE)                                                         | Mouse  |          | 4°C, 30min           | Abcam, USA                     |
| Flag                                                              | Rabbit | 1:1000   | 4°C, overnight       | GenScript, USA                 |
| TNF- $\alpha$                                                     | Rabbit | 1:100    | 4°C, overnight       | BOSTER, China                  |
| IL-6                                                              | Rabbit | 1:100    | 4°C, overnight       | BOSTER, China                  |
| IL-1 $\beta$                                                      | Rabbit | 1:100    | 4°C, overnight       | BOSTER, China                  |
| $\beta$ -actin                                                    | Rabbit | 1:500    | 4°C, overnight       | Sangon Biotech, China          |
| Lamin A                                                           | Rabbit | 1:500    | 4°C, overnight       | BOSTER, China                  |
| <b>Second antibody</b>                                            |        |          |                      |                                |
| Alexa Fluor® 594-Conjugated AffiniPure Goat Anti-Rabbit IgG (H+L) |        | 1:300    | Room temperature, 1h | ZSGB-BIO, China                |
| Alexa Fluor® 488-Conjugated AffiniPure Goat Anti-Rabbit IgG (H+L) |        | 1:300    | Room temperature, 1h | ZSGB-BIO, China                |
| IRDye 800 CW goat anti-mouse                                      |        | 1:15000  | Room temperature, 1h | LI-COR Biosciences, USA        |
| IRDye 680 CW goat anti-mouse                                      |        | 1:15000  | Room temperature, 1h | LI-COR Biosciences, USA        |
| IRDye 800 CW goat anti-rabbit                                     |        | 1:15000  | Room temperature, 1h | LI-COR Biosciences, USA        |
| IRDye 680 CW goat anti-rabbit                                     |        | 1:15000  | Room temperature, 1h | LI-COR Biosciences, USA        |

**Supplementary Table S2. RT-qPCR Primers**

| Gene name      | RT-qPCR primers | Primer sequence 5' -3'   | Size (bp) |
|----------------|-----------------|--------------------------|-----------|
| IGHG1          | Sense           | ACTCCGACGGCTCCTTCTTC     | 20        |
|                | Antisense       | TTCTGCGTGTAGTGG TTGTGC   | 21        |
| TNF- $\alpha$  | Sense           | CCTCTCTCTAATCAGCCCTCTG   | 22        |
|                | Antisense       | GAGGACCTGGGAGTAGATGAG    | 21        |
| IL-6           | Sense           | ACTCACCTCTTCAGAACGAATTG  | 23        |
|                | Antisense       | CCATCTTTGGAAGGTTTCAGGTTG | 23        |
| IL-1 $\beta$   | Sense           | ATGATGGCTTATTACAGTGGCAA  | 23        |
|                | Antisense       | GTCGGAGATTCGTAGCTGGA     | 20        |
| TLR4           | Sense           | AGTTGATCTACCAAGCCTTGAGT  | 23        |
|                | Antisense       | GCTGGTTGTCCCAAATCACTTT   | 23        |
| $\beta$ -actin | Sense           | AGCGAGCATCCCCAAAGTT      | 20        |
|                | Antisense       | GGGCACGAAGGCTCATCATT     | 20        |
